# Supplementary material for: Glial cell reactivity and oxidative stress prevention in Alzheimer’s disease mice model by an optimized NMDA receptor antagonist
Source: PubMed Central journal article supplement (PMC9596444; doi:10.1038/s41598-022-22963-x), 2022-10-25

**Supplementary Fig. 1.** Representative Western Blot and quantification for CD68 (a). GO database results: Cluster 1 (b,c), Cluster 2 (d,e), Cluster 3 (f,g). KEGG analysis for Cluster 1 (h), Cluster 2 (i) and Cluster 3 (j).

## GO

### Cluster 1

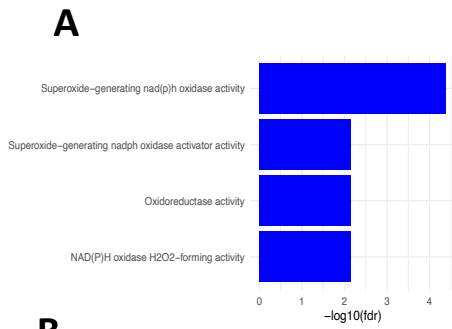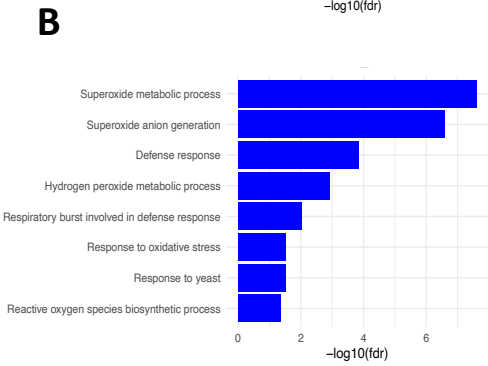

### Cluster 2

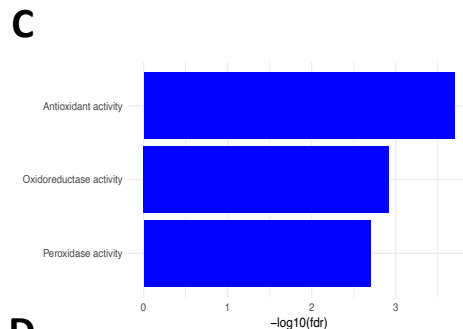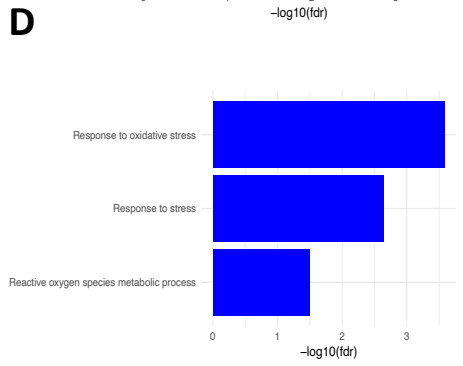

### Cluster 3

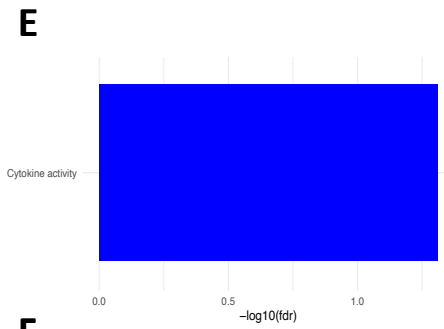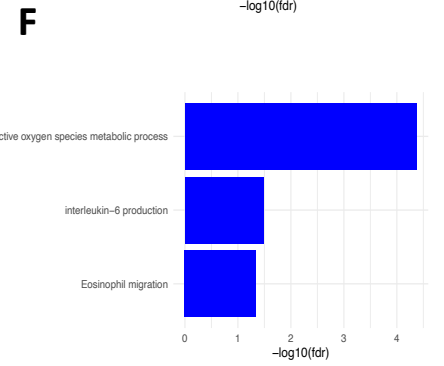

## KEGG

### Cluster 1

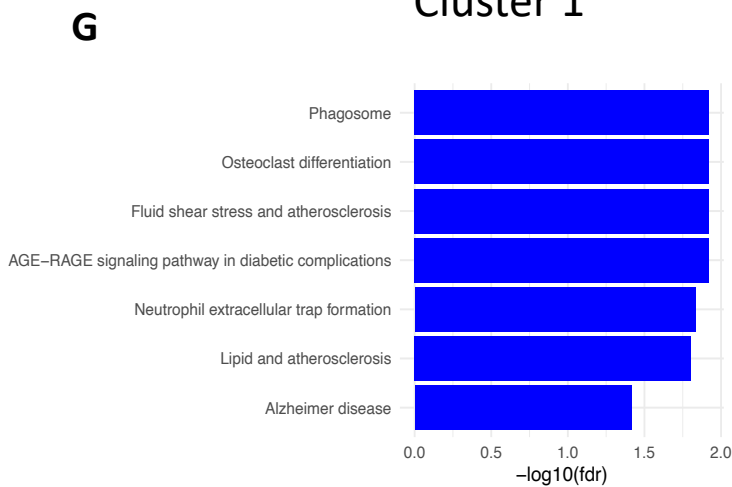

### Cluster 2

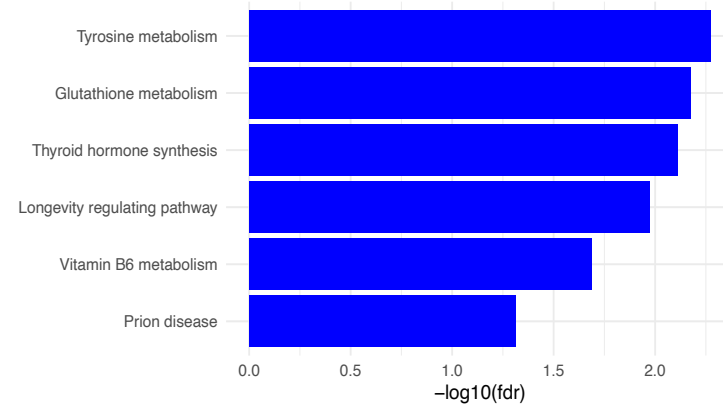

### Cluster 3

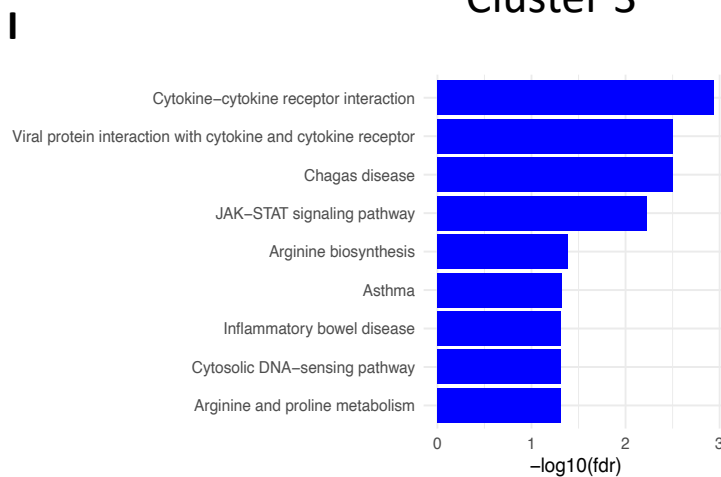

Supplement: 41598_2022_22963_MOESM1_ESM.pdf [file 41598_2022_22963_MOESM1_ESM.pdf]
