# Supplementary material for: Glial cell reactivity and oxidative stress prevention in Alzheimer’s disease mice model by an optimized NMDA receptor antagonist
Source: PubMed Central journal article supplement (PMC9596444; doi:10.1038/s41598-022-22963-x), 2022-10-25

**Calcineurin**

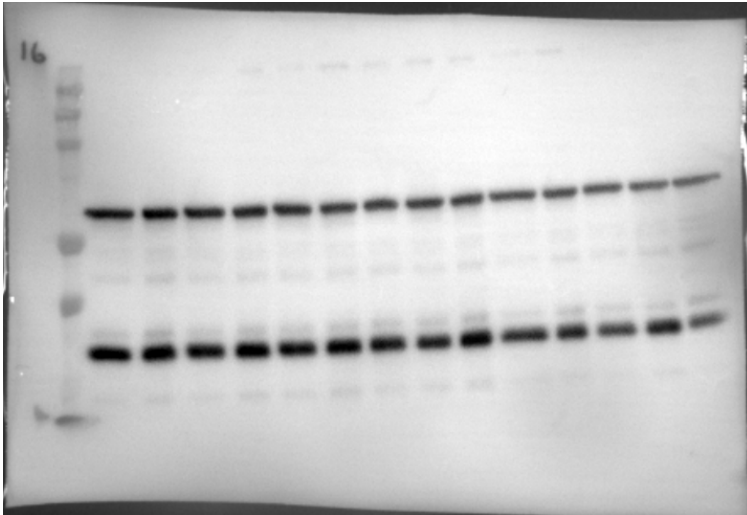

**GAPDH for Calcineurin**

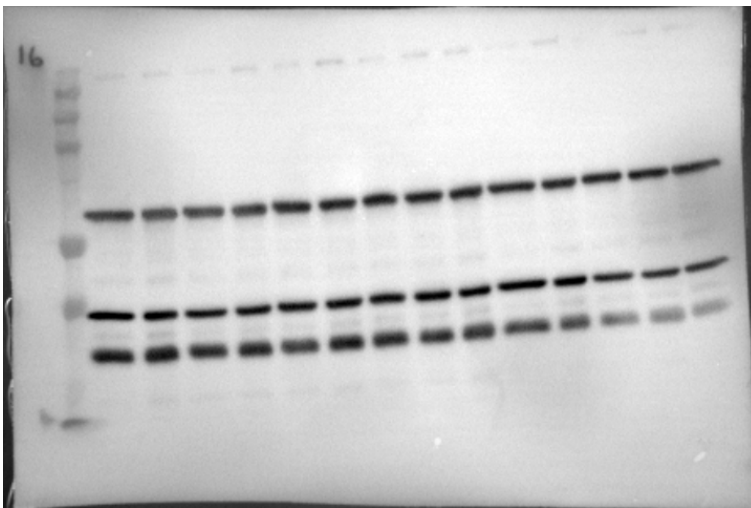

**NFAT**

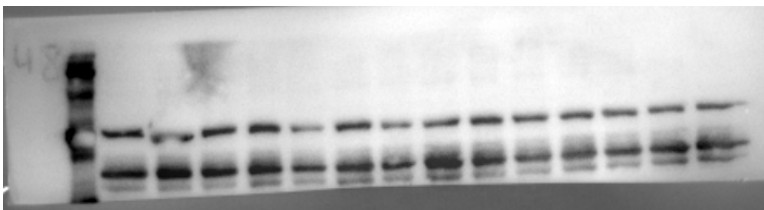

**GAPDH for NFAT**

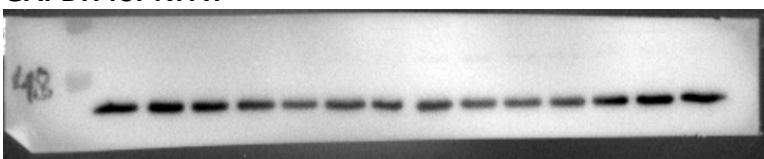

**p-NFAT**

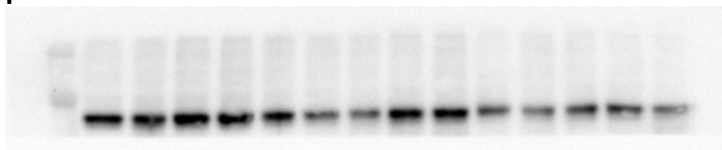

**GAPDH for p-NFAT**

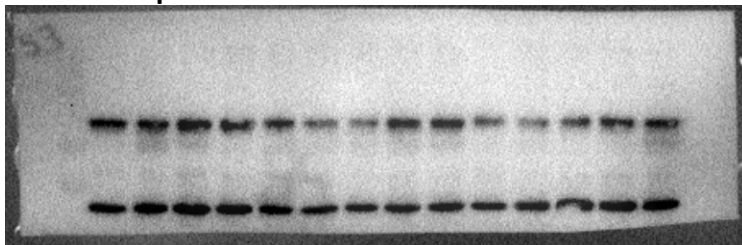

**GFAP**

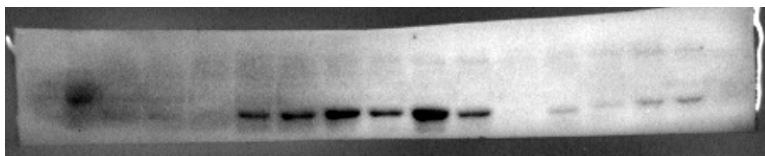

**GAPDH for GFAP**

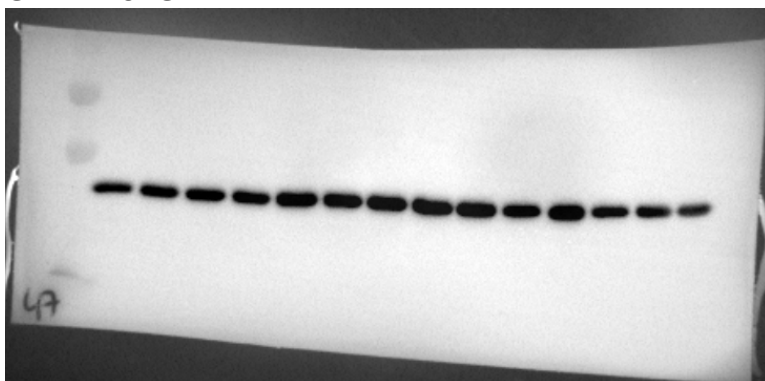

**NF-KB**

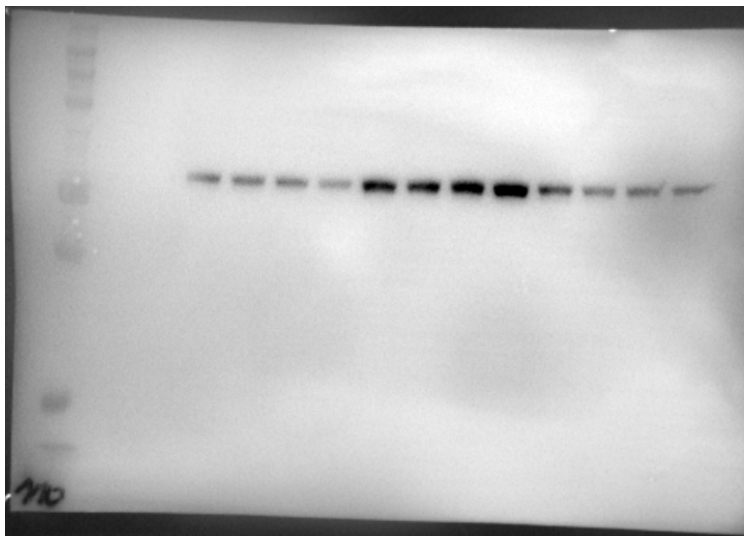

**GAPDH for NF-KB**

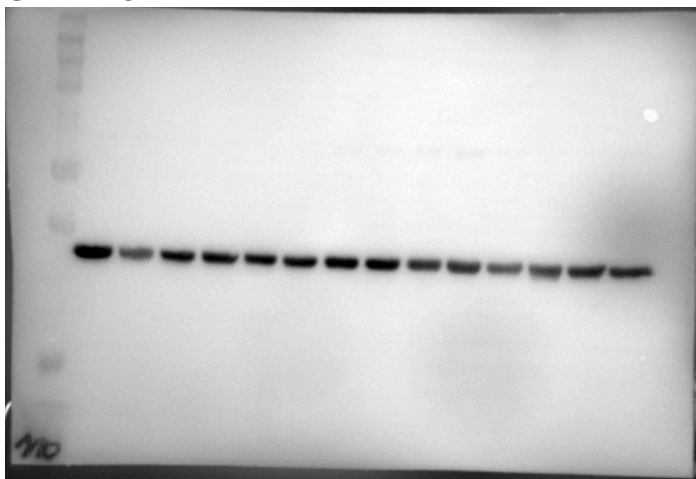

**CD68**

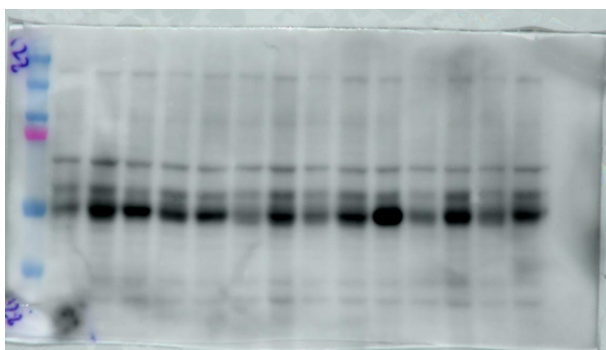

GAPDH for CD68

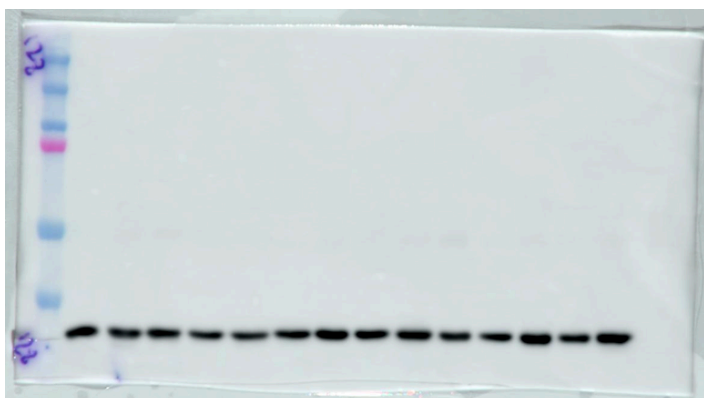

Supplement: 41598_2022_22963_MOESM2_ESM.pdf [file 41598_2022_22963_MOESM2_ESM.pdf]
